# Supplementary material for: Dissecting Rubella Placental Infection in an In Vitro Trophoblast Model
Source: MDPI journal article supplement (doi:10.3390/ijms24097894), 2023-04-26
Supplement: s1 [file s1]

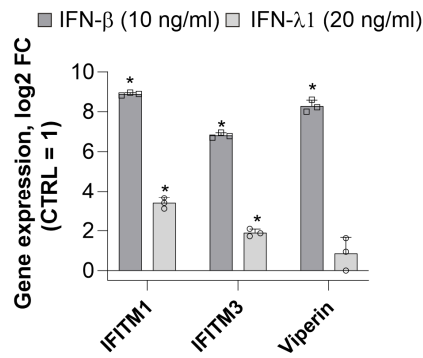

Supplement Figure S1. Quantification of mRNA expression of indicated ISGs by qPCR after incubation with indicated IFNs for 24 hours. Expression data were normalized to  $\beta$ -actin mRNA in the comparative cycle threshold method ( $\Delta\Delta C_t$ ). All data (n=3) are shown as mean + SD, \*  $p < 0.05$  as determined by unpaired Student's t test.

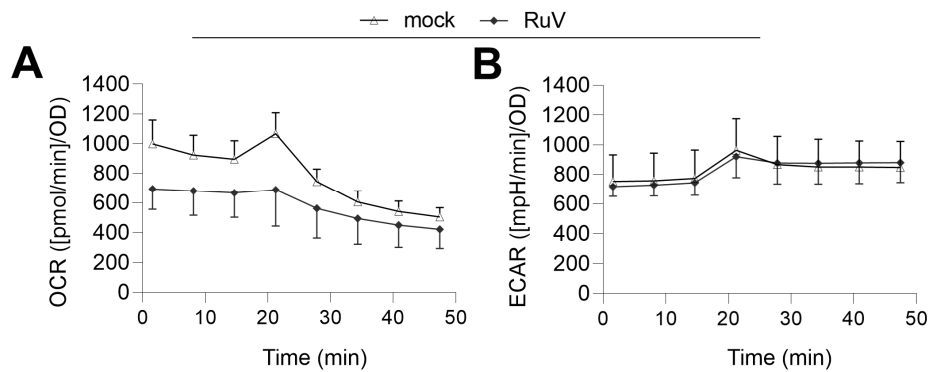

Supplement Figure S2. Measurement file of (A) OCR and (B) ECAR. The cell energy phenotype kit was used for mock- and RuV-infected BeWo at 72 hpi.
